# Supplementary material
Source: Research Square preprint supplement (doi:10.21203/rs.3.rs-9251485/v1)
Supplement: Supplementary file 1 [file b25a8bad71f4823cf595cdc0.pdf]

## Supplementary Information

### The effects of intracrystalline chain diffusion on the non-linear mechanics of semicrystalline polymers

Rose Mary Michell<sup>1,2\*</sup>, Albrecht Petzold<sup>1</sup>, Thomas Thurn-Albrecht<sup>1\*</sup>

<sup>1</sup> Martin-Luther-University Halle-Wittenberg, Institute of Physics, D-06099 Halle, Germany.

<sup>2</sup> Current affiliation: Dep. de Ciència i Enginyeria de Materials, eb-POLICOM-e-PLASCOM, Escola d'Enginyeria de Barcelona Est (EEBE), Universitat Politècnica de Catalunya, BarcelonaTech (UPC), Av. Eduard Maristany 16, 08019 Barcelona, Spain

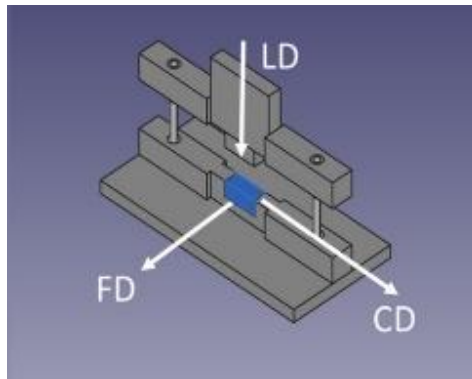

Supplementary Figure 1: Schematic representation of the tool used for plane strain compression. The arrows indicate the different directions, FD: flow direction, CD: control direction, and LD: loading direction. The blue prism represents the sample.

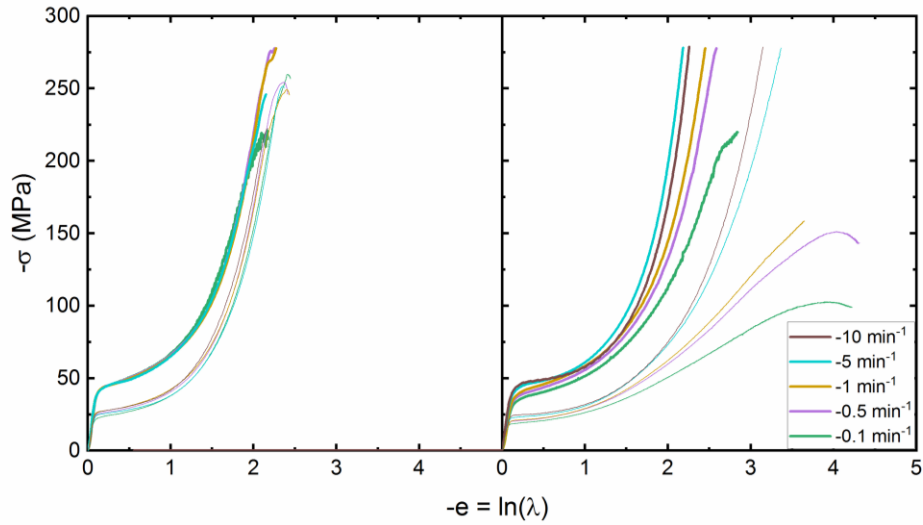

Supplementary Figure 2: Exemplary continuous true stress vs. true strain curves of a) PCL and b) PEO<sup>100</sup> at -10 °C. Measurements were taken at the indicated constant true strain rates. For comparison the data taken at 30 °C are shown with thinner lines.

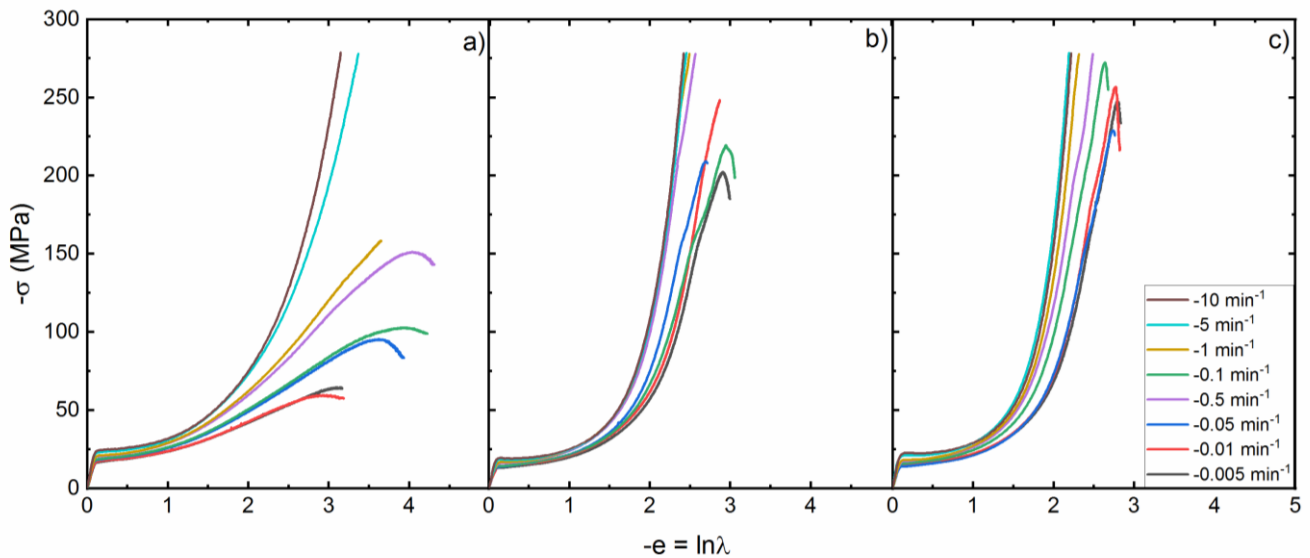

Supplementary Figure 3: Exemplary continuous true stress vs. true strain curves of a) PEO100, b) PEO400, and c) PEO900 at 30 °C. Measurements were taken at the indicated constant true strain rates.
